# Supplementary material for: Mechanistic basis for the recognition of laminin-511 by α6β1 integrin
Source: PubMed Central journal article supplement — Sci Adv. 2017 Sep 1;3(9):e1701497. doi: 10.1126/sciadv.1701497 (PMC5580876; doi:10.1126/sciadv.1701497), 2017-09-01
Supplement: 1701497_SM.pdf [file 1701497_SM.pdf]

## Supplementary Materials for

### **Mechanistic basis for the recognition of laminin-511 by $\alpha6\beta1$ integrin**

Mamoru Takizawa, Takao Arimori, Yukimasa Taniguchi, Yu Kitago, Erika Yamashita,  
Junichi Takagi, Kiyotoshi Sekiguchi

Published 1 September 2017, *Sci. Adv.* **3**, e1701497 (2017)

DOI: 10.1126/sciadv.1701497

#### **This PDF file includes:**

- fig. S1. Preparation and crystallization of tLM511E8.
- fig. S2. Comparison of the crystal structures of tLM511E8 and mini-E8 of LM111.
- fig. S3. Electron microscopic imaging of the LM511E8– $\alpha6\beta1$  integrin complex.
- fig. S4. Cys-substituted residues on  $\beta1$  domain.
- fig. S5. Integrin binding activity of wild-type and Cys-substituted LM511E8s.
- fig. S6. Disulfide formation between Cys-substituted LM511E8 and  $\alpha6\beta1$  integrin.
- fig. S7. Disulfide cross-link assays using LM511E8/I1606C/EQ and LM511E8/K1608C/EQ.
- fig. S8. Inhibition of the LM511E8– $\alpha6\beta1$  integrin interaction by wild-type and  $\Delta\gamma1C5$  LM511E8.
- table S1. Data collection and refinement statistics.

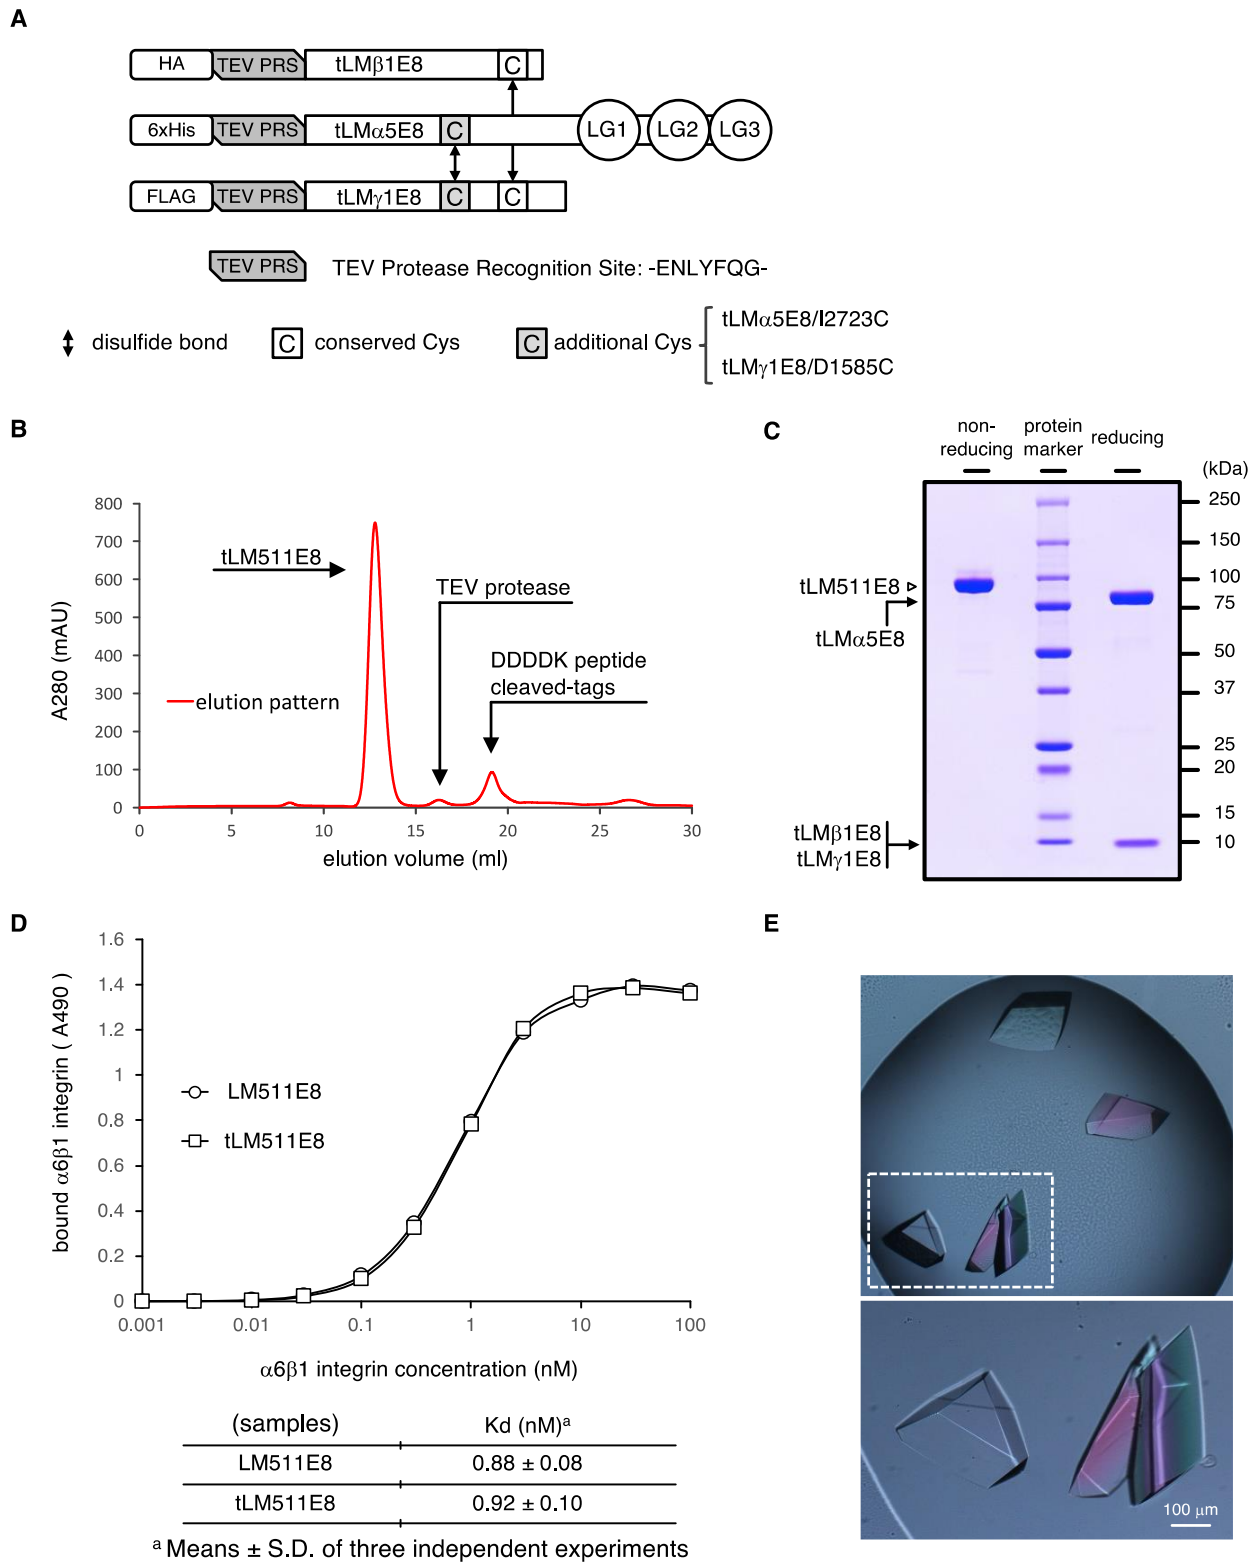

**fig. S1. Preparation and crystallization of tLM511E8.** (A) Schematic drawing of tLM511E8. To prevent unexpected dissociation of the heterotrimeric coiled-coil assembly in various solvent conditions, an additional disulfide bond was introduced into the coiled-coil by Cys-substitutions for residues  $\alpha$ 5-

I2723 and  $\gamma$ 1-D1585. **(B)** Gel filtration chromatography of TEV protease-treated tLM511E8. **(C)** The peak fraction containing the cleaved tLM511E8 was subject to SDS-PAGE in nonreducing and reducing conditions. **(D)** Microtiter plates were coated with LM511E8 and tLM511E8, and then incubated with  $\alpha$ 6 $\beta$ 1 integrin in the presence of 1 mM MnCl<sub>2</sub>. The bound integrins were quantified with biotinylated anti-Velcro pAb and HRP-conjugated streptavidin as described in “Materials and Methods”. The amounts of integrin bound in the presence of 10 mM EDTA were used as negative controls and subtracted as background. The results are means  $\pm$  S.D. of three independent experiments. **(E)** Crystals of tLM511E8.

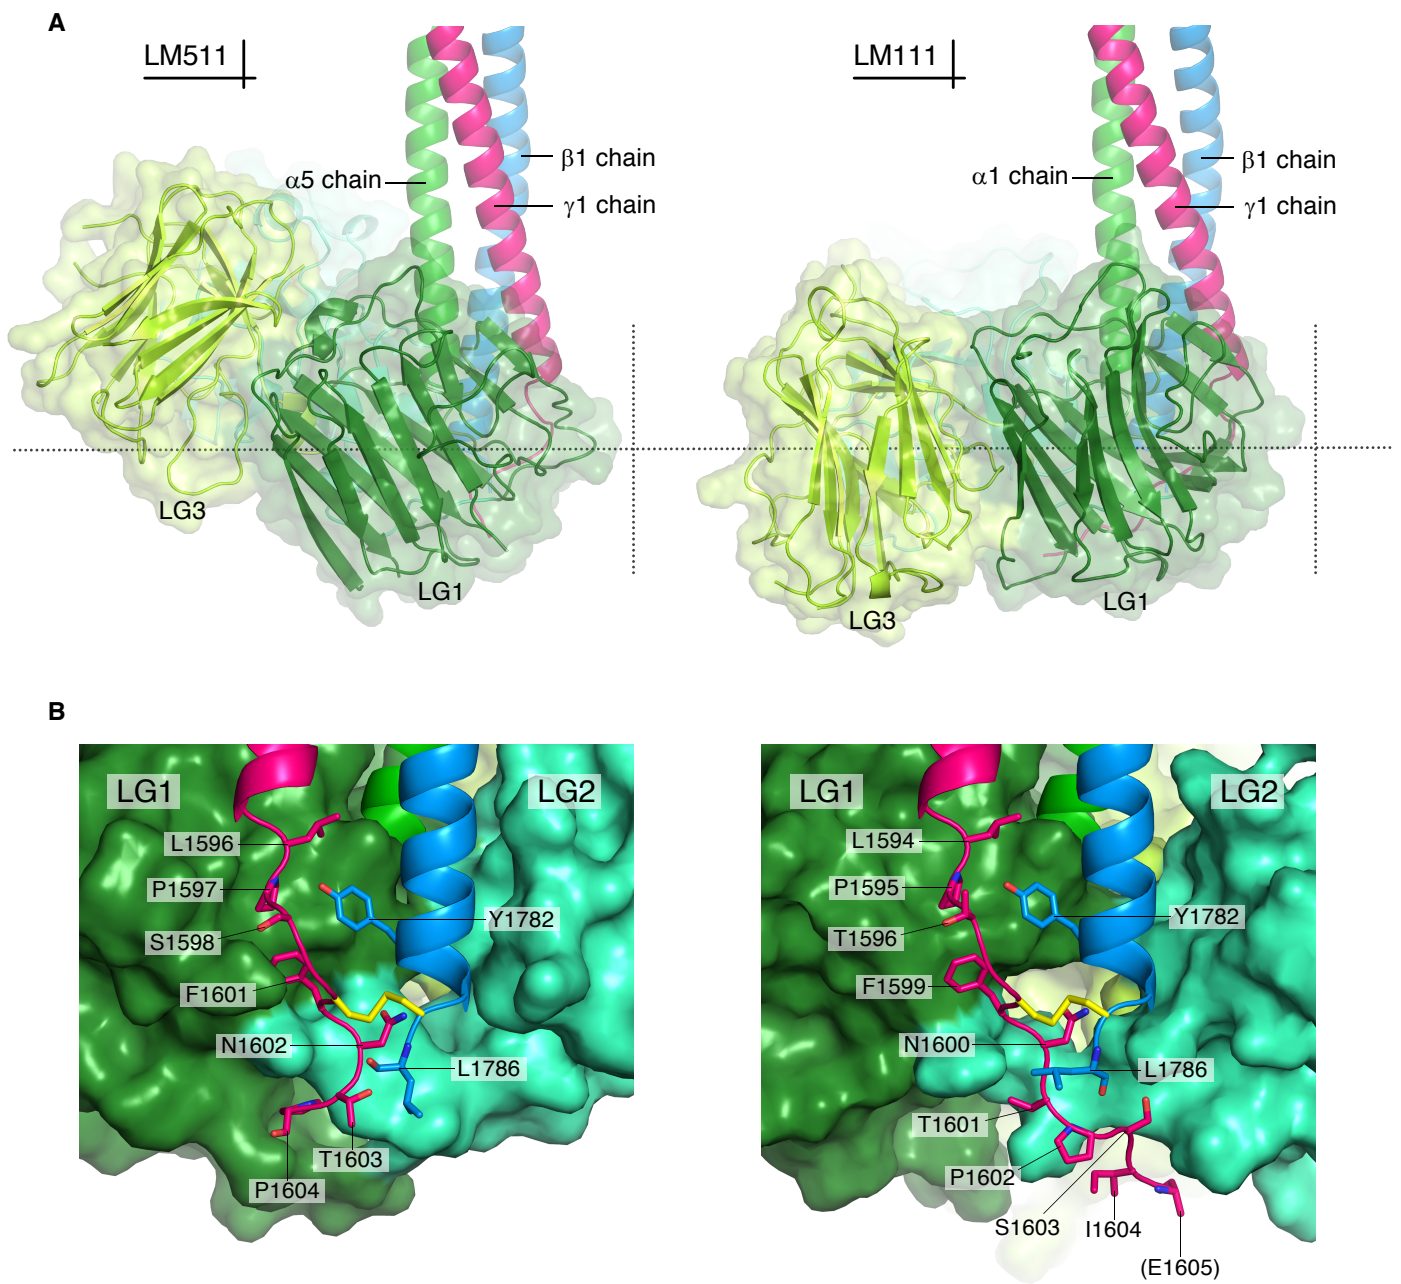

**fig. S2. Comparison of the crystal structures of tLM511E8 and mini-E8 of LM111.** (A) The LG1–LG3 interface of tLM511E8 (*left*) and mini-E8 of LM111 (*right*). (B) The  $\beta$ 1– $\gamma$ 1 dimer clamped between LG1 and LG2 in tLM511E8 (*left*) and mini-E8 of LM111 (*right*).

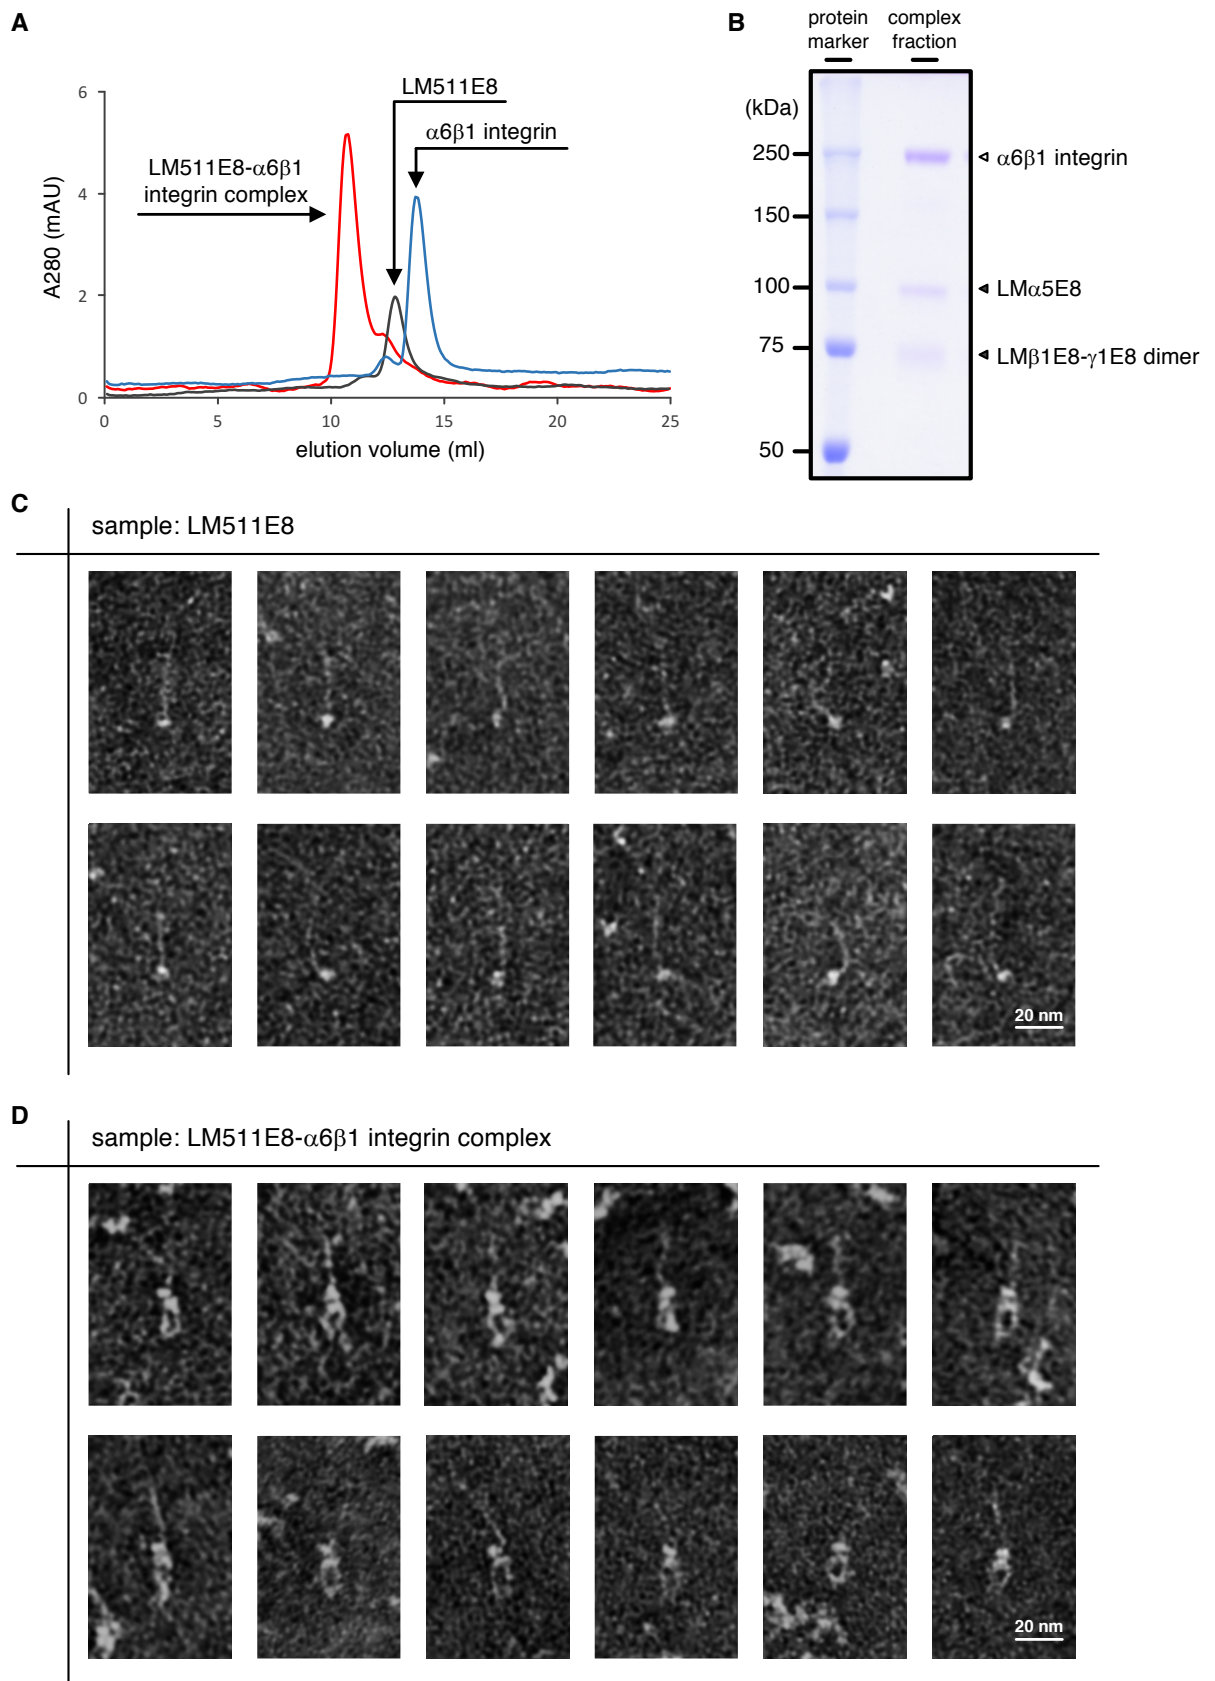

**fig. S3. Electron microscopic imaging of the LM511E8- $\alpha6\beta1$  integrin complex.** (A) Elution profiles from gel filtration chromatography for LM511E8 (grey),  $\alpha6\beta1$  integrin (blue), and LM511E8- $\alpha6\beta1$  integrin complex (red). (B) The complex fraction was subject to nonreducing SDS-PAGE and CBB staining. (C, D) Galleries of electron microscopic images of LM511E8 (C) and LM511E8- $\alpha6\beta1$  integrin complex (D).

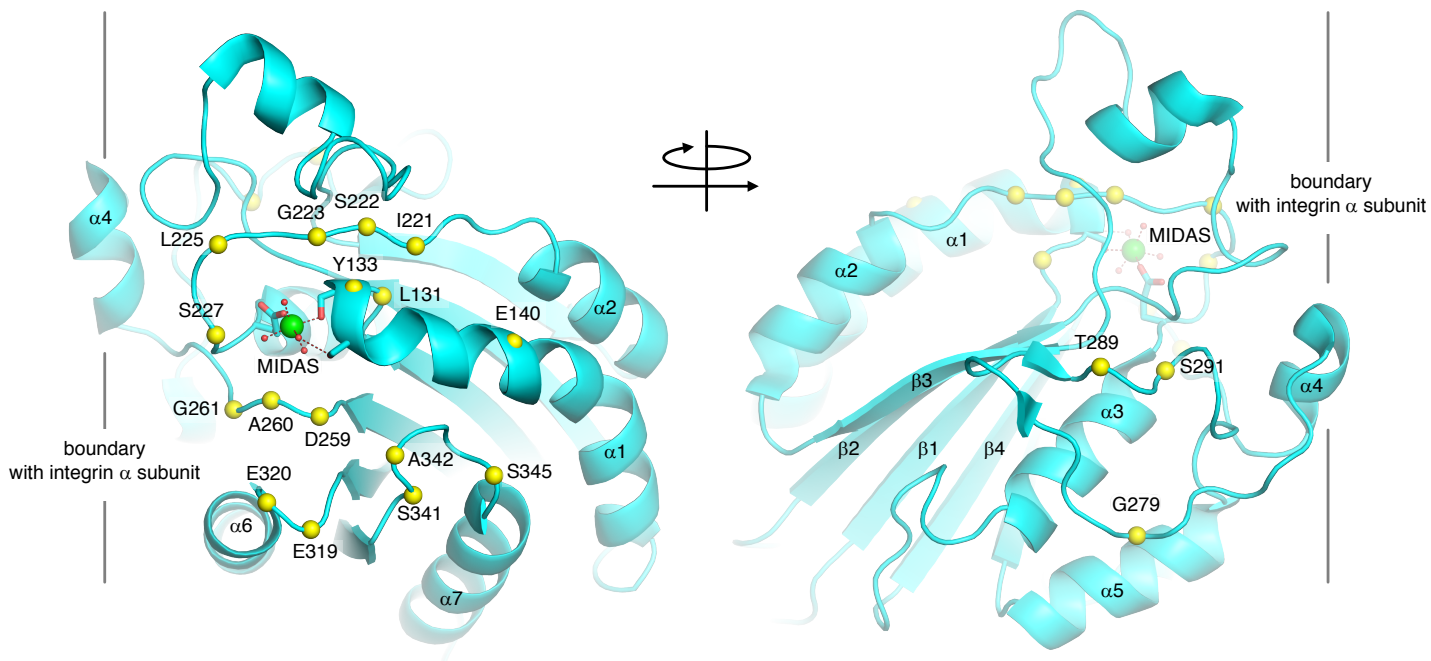

**fig. S4. Cys-substituted residues on  $\beta$ I domain.**  $C\alpha$  atoms of 19 Cys-substituted residues are marked with yellow spheres on the crystal structure of the  $\beta$ I domain of human integrin  $\beta$ 1 (PDB: 4WJK). The metal ion in the metal ion-dependent adhesion site of the integrin  $\beta$ 1 ( $\beta$ 1-MIDAS) is shown as a green sphere.

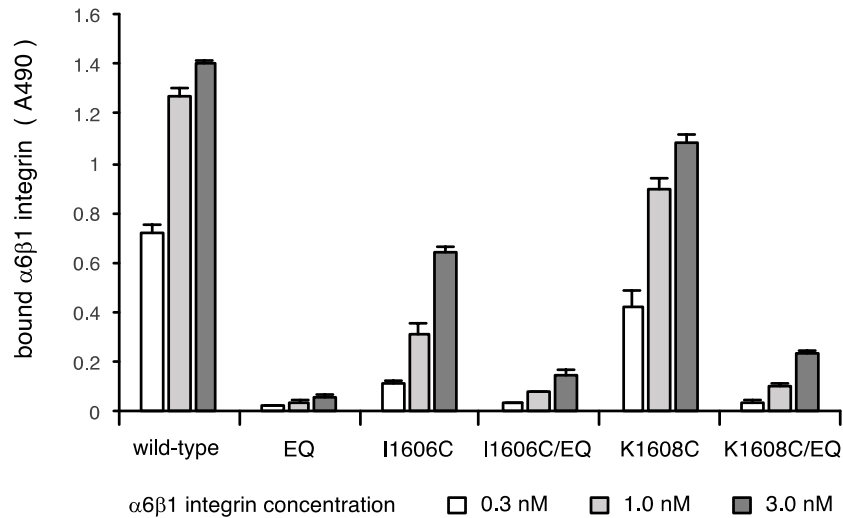

**fig. S5. Integrin binding activity of wild-type and Cys-substituted LM511E8s.** Microtiter plates were coated with LM511E8/wild-type, LM511E8/I1606C, LM511E8/K1608C, and their E to Q mutants and then incubated with  $\alpha6\beta1$  integrin in the presence of 1 mM  $MnCl_2$ . Bound integrins were quantified using biotinylated anti-Velcro pAb and HRP-conjugated streptavidin as described in “Materials and Methods”. The amounts of integrin bound in the presence of 10 mM EDTA were used as negative controls and subtracted as background. Each column represents the mean  $\pm$  S.D. of three independent experiments.

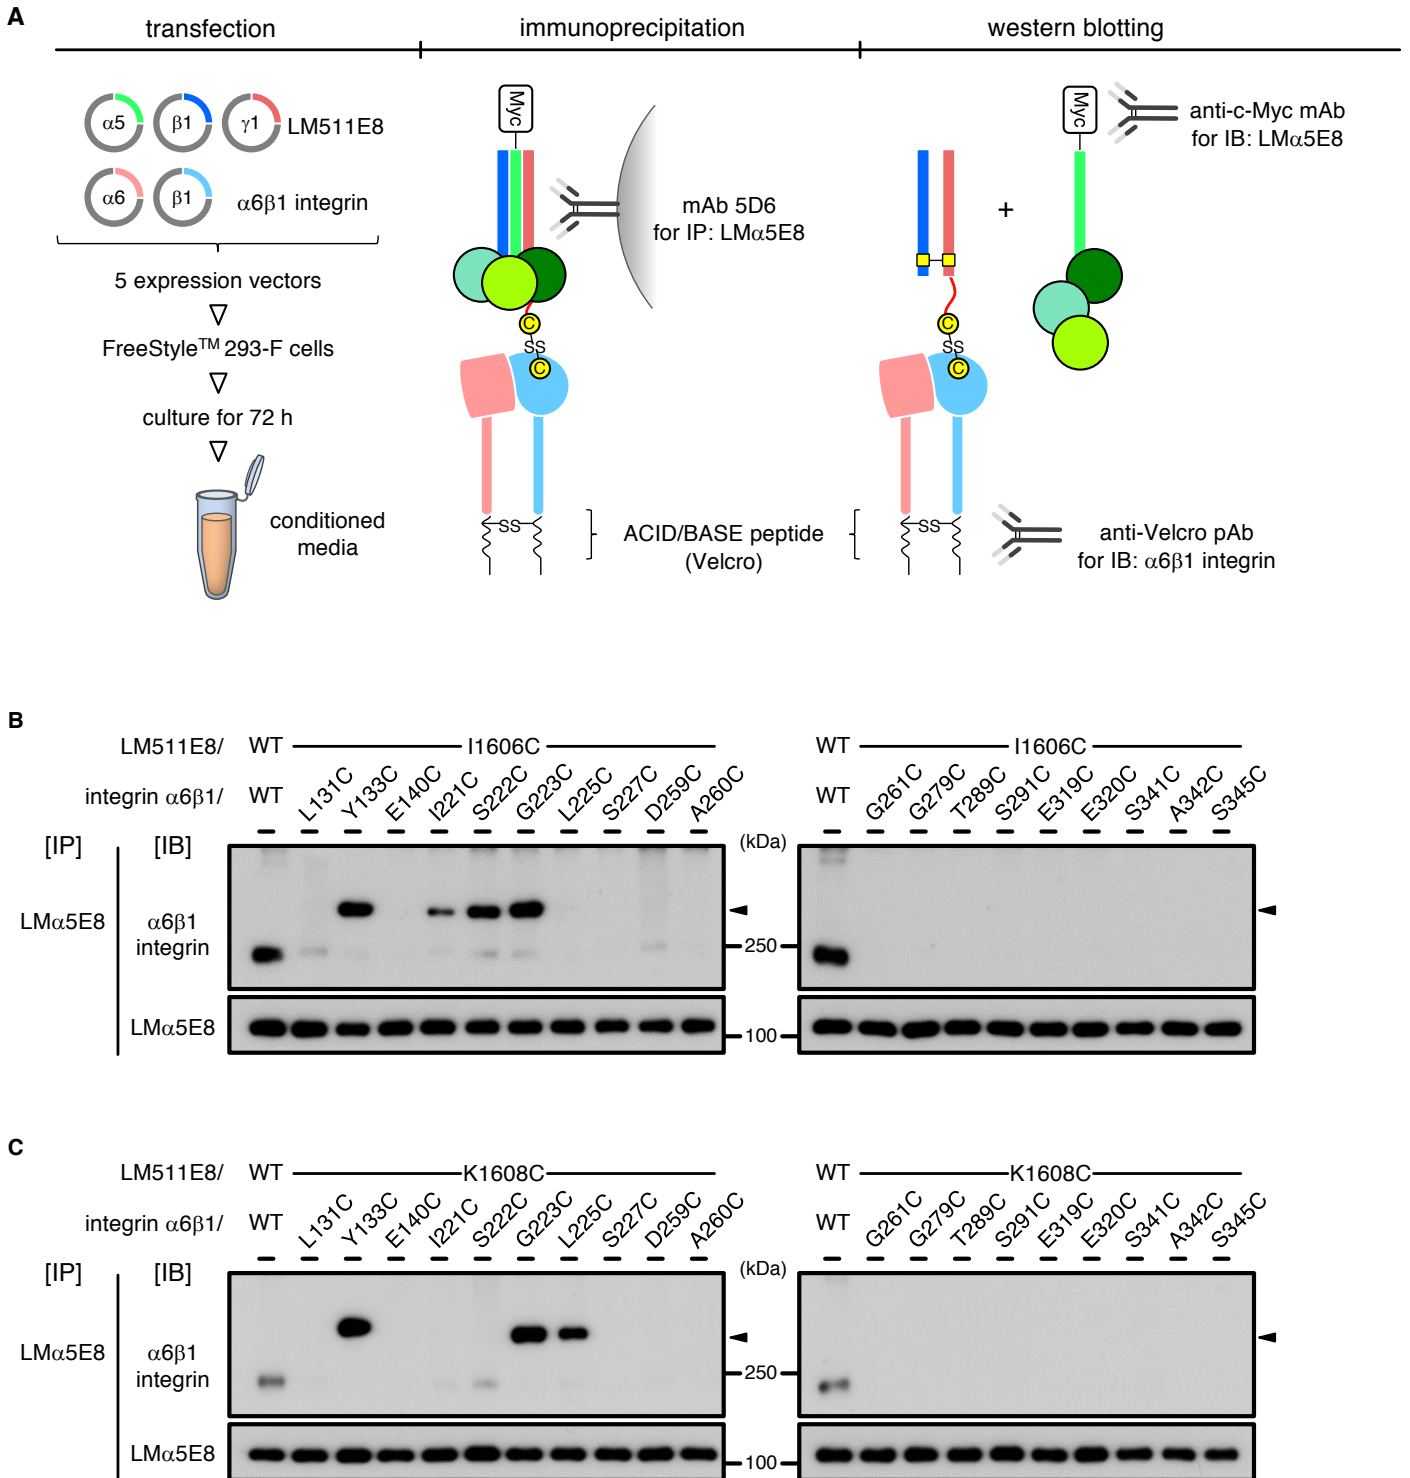

**fig. S6. Disulfide formation between Cys-substituted LM511E8 and  $\alpha 6\beta 1$  integrin.** (A) Schematic diagram of the disulfide crosslink assay. LM511E8 and  $\alpha 6\beta 1$  integrin were coexpressed in FreeStyle™ 293-F cells (*left*) followed by immunoprecipitation of the secreted LM511E8- $\alpha 6\beta 1$  integrin complex with mAb 5D6 against human laminin  $\alpha 5$  chain (*middle*). Immunoprecipitates were subjected to SDS-PAGE in nonreducing conditions and subsequent immunoblotting with anti-Velcro pAb or anti-c-Myc mAb (*right*). (B) The results of intermolecular disulfide crosslink assays between LM511E8/I1606C and Cys-substituted  $\alpha 6\beta 1$  integrins. (C) The results of intermolecular disulfide crosslink assays between LM511E8/K1608C and Cys-substituted  $\alpha 6\beta 1$  integrins. Arrow heads indicate disulfide linked products.



**A**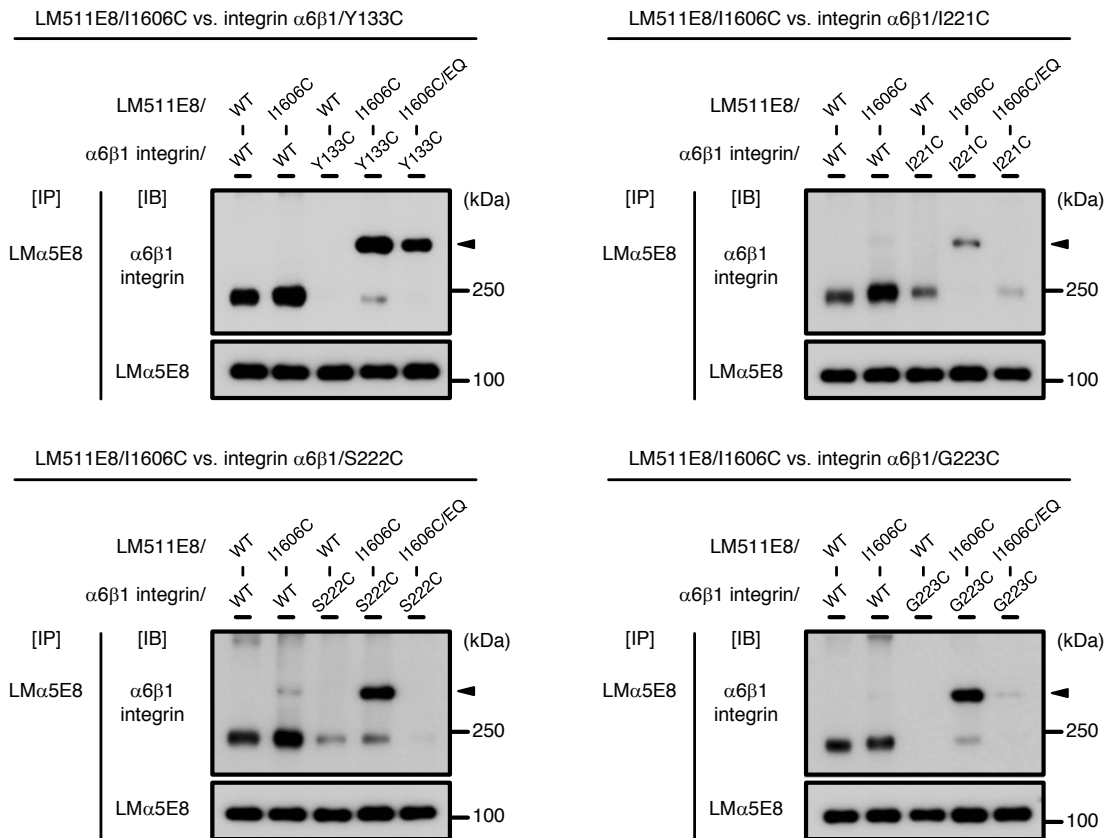**B**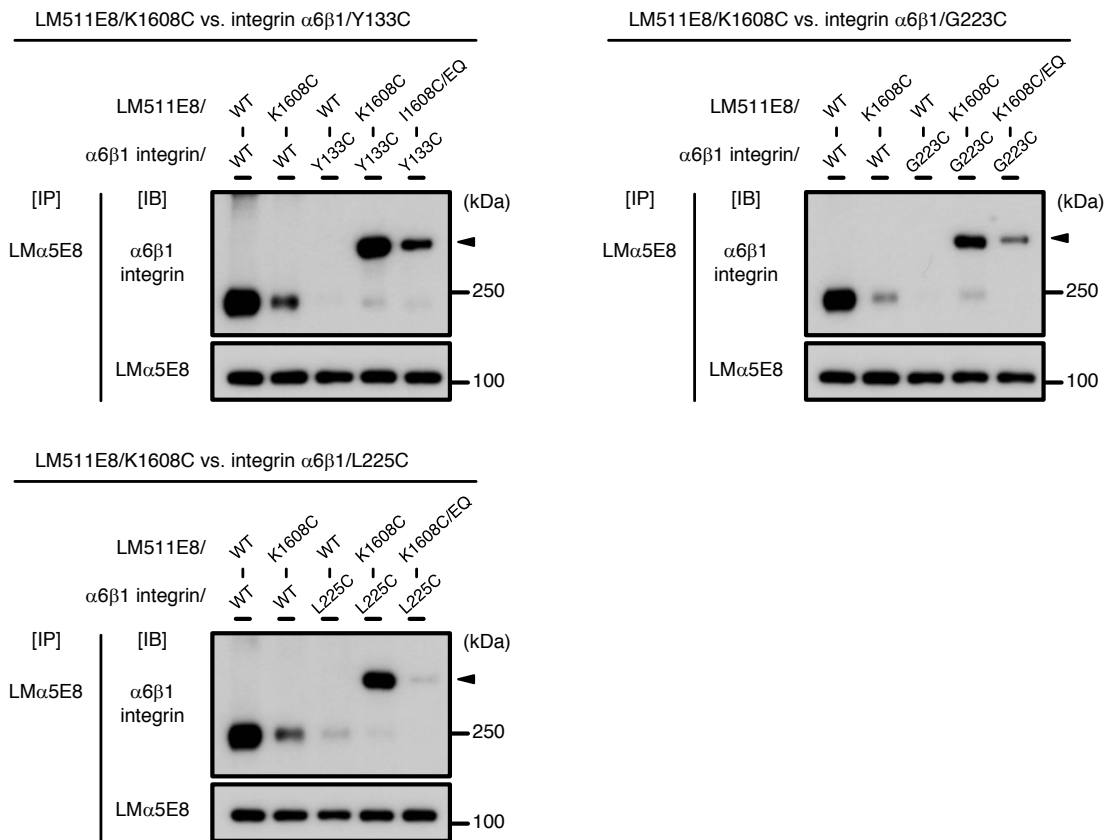

**fig. S7. Disulfide cross-link assays using LM511E8/I1606C/EQ and LM511E8/K1608C/EQ. (A)** Effects of Glu→Gln (EQ) mutation on disulfide formation between LM511E8/I1606C and Cys-substituted  $\alpha 6\beta 1$  integrins (Y133C, I221C, S222C, and G223C). **(B)** Effects of the EQ mutation on disulfide formation between LM511E8/K1608C and Cys-substituted  $\alpha 6\beta 1$  integrins (Y133C, G223C, and L225C).

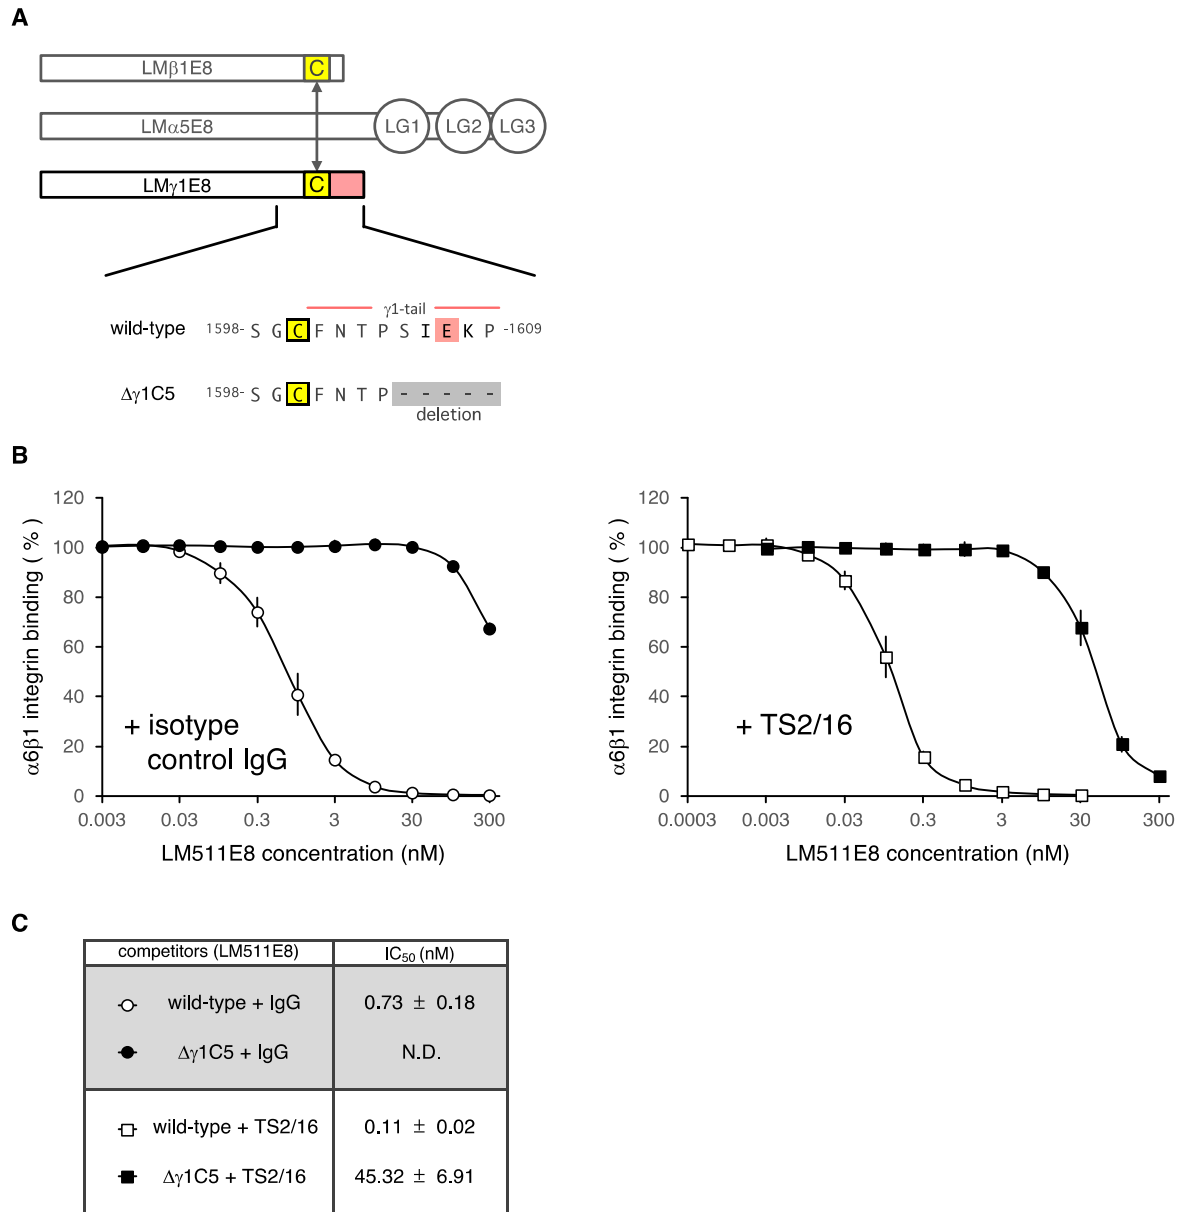

**fig. S8. Inhibition of the LM511E8– $\alpha$ 6 $\beta$ 1 integrin interaction by wild-type and  $\Delta\gamma$ 1C5 LM511E8.** (A) Schematic drawing of wild-type and  $\Delta\gamma$ 1C5 LM511E8. (B) Inhibition of  $\alpha$ 6 $\beta$ 1 integrin binding to LM511E8 by wild-type (white) or  $\Delta\gamma$ 1C5 (black) LM511E8, in the absence (circle) or presence (square) of integrin  $\beta$ 1 activating mAb TS2/16. (C) IC<sub>50</sub> values of LM511E8 (means ± S.D. of three independent experiments). N.D., not determined.

**table S1. Data collection and refinement statistics.**

| Data name<br>PDB ID                                     | LM511E8 (for S-SAD) <sup>a</sup> | LM511E8<br>5XAU           |
|---------------------------------------------------------|----------------------------------|---------------------------|
| <b>Data collection</b>                                  |                                  |                           |
| Source                                                  | PF BL-1A                         | SPring-8 BL44XU           |
| Space group                                             | <i>C2</i>                        | <i>C2</i>                 |
| Cell dimensions                                         |                                  |                           |
| <i>a, b, c</i> (Å)                                      | 175.4, 122.0, 107.7              | 175.0, 121.6, 107.6       |
| $\beta$ (°)                                             | 127.6                            | 127.6                     |
| Wavelength (Å)                                          | 2.7                              | 0.9                       |
| Resolution (Å)                                          | 50.0 - 2.48 (2.54 - 2.48)        | 50.0 - 1.80 (1.83 - 1.80) |
| $R_{\text{merge}}$ or $R_{\text{sym}}$ (%) <sup>b</sup> | 10.3 (133)                       | 6.5 (114)                 |
| $\langle I/\sigma(I) \rangle$                           | 20.9 (0.87)                      | 16.7 (1.4)                |
| Completeness (%)                                        | 98.3 (87.1)                      | 99.9 (100.0)              |
| Redundancy                                              | 16.4 (3.7)                       | 3.8 (3.8)                 |
| <b>Refinement</b>                                       |                                  |                           |
| Resolution (Å)                                          |                                  | 49.41 - 1.80              |
| No. of reflections                                      |                                  | 155,954                   |
| $R_{\text{work}} / R_{\text{free}}$ (%) <sup>c</sup>    |                                  | 20.2/23.7                 |
| No. of atoms                                            |                                  |                           |
| Protein                                                 |                                  | 11,383                    |
| Ca <sup>2+</sup>                                        |                                  | 2                         |
| Water                                                   |                                  | 591                       |
| Average <i>B</i> factors (Å <sup>2</sup> )              |                                  |                           |
| Protein                                                 |                                  | 36.2                      |
| Ca <sup>2+</sup>                                        |                                  | 33.7                      |
| Water                                                   |                                  | 36.6                      |
| r.m.s. deviations                                       |                                  |                           |
| Bond length (Å)                                         |                                  | 0.011                     |
| Bond angle (°)                                          |                                  | 1.47                      |

Values in parentheses correspond to the highest resolution shell.

<sup>a</sup>Three datasets collected from the same crystal were merged.

<sup>b</sup> $R_{\text{sym}} = 100 \times \frac{\sum |I_{hkl} - \langle I_{hkl} \rangle|}{\sum I_{hkl}}$ ,  $\langle I_{hkl} \rangle$  is the mean value of  $I_{hkl}$ .

<sup>c</sup> $R_{\text{work}} = 100 \times \frac{\sum ||F_o| - |F_c||}{\sum |F_o|}$ .  $R_{\text{free}}$  was calculated from the test set (5% of the total data).
